# Supplementary material for: Genome-wide Identification and Analysis of CCT&nbsp;Genes in Wheat (Triticum Aestivum L.)
Source: Research Square preprint supplement (doi:10.21203/rs.3.rs-104841/v1), 2020-11-13
Supplement: Supplementary file 1 [file 5599713c6afd1d40cb0530bc.xlsx]

## Sheet: CCT_At_Bd_Os
Rice
Name	Gene_ID	Protein_ID	Alter_Name
OsA	LOC_Os06g16370	LOC_Os06g16370.1	Hd1
OsB	LOC_Os09g06464	LOC_Os09g06464.1	OsCO3
OsC	LOC_Os04g42020	LOC_Os04g42020.1
OsD	LOC_Os02g39710	LOC_Os02g39710.1
OsE	LOC_Os06g44450	LOC_Os06g44450.1
OsF	LOC_Os02g08150	LOC_Os02g08150.1
OsG	LOC_Os08g15050	LOC_Os08g15050.1
OsJ	LOC_Os03g50310	LOC_Os03g50310.1
OsK	LOC_Os02g49880	LOC_Os02g49880.1
OsL	LOC_Os06g15330	LOC_Os06g15330.1
OsM	LOC_Os06g19444	LOC_Os06g19444.1
OsN	LOC_Os02g49230	LOC_Os02g49230.1
OsO	LOC_Os08g42440	LOC_Os08g42440.1
OsP	LOC_Os03g22770	LOC_Os03g22770.1
OsQ	LOC_Os09g33550	LOC_Os09g33550.1
OsR	LOC_Os07g47140	LOC_Os07g47140.1
OsS	LOC_Os06g01340	LOC_Os06g01340.1
OsCMF1	LOC_Os01g61900	LOC_Os01g61900.1
OsCMF2	LOC_Os02g01990	LOC_Os02g01990.1
OsCMF3	LOC_Os02g05470	LOC_Os02g05470.1
OsCMF4	LOC_Os03g04620	LOC_Os03g04620.1
OsCMF5	LOC_Os05g38990	LOC_Os05g38990.1
OsCMF6	LOC_Os05g51690	LOC_Os05g51690.1
OsCMF7	LOC_Os06g48610	LOC_Os06g48610.1
OsCMF8	LOC_Os07g15770	LOC_Os07g15770.1	OsI/Ghd7
OsCMF10	LOC_Os10g32900	LOC_Os10g32900.1
OsCMF11	LOC_Os10g41100	LOC_Os10g41100.1	OsH
OsCMF12	LOC_Os11g01074	LOC_Os11g01074.4
OsCMF13	LOC_Os12g01080	LOC_Os12g01080.1
OsCMF14	LOC_Os12g16160	LOC_Os12g16160.1
OsTOC1	LOC_Os02g40510	LOC_Os02g40510.1
OsPRR37	LOC_Os07g49460	LOC_Os07g49460.1
OsPRR59	LOC_Os11g05930	LOC_Os11g05930.1
OsPRR73	LOC_Os03g17570	LOC_Os03g17570.1
OsPRR95	LOC_Os09g36220	LOC_Os09g36220.1
OsZIM1	LOC_Os06g48534	LOC_Os06g48534.1
OsZIM2	LOC_Os03g52450	LOC_Os03g52450.1
OsZIM3	LOC_Os02g05510	LOC_Os02g05510.1
OsZIM4	LOC_Os03g47970	LOC_Os03g47970.1
Brachpodium distachyon
Name	Gene_ID	Protein_ID	Alter_Name
BdCO1	BRADI_1g43670v3	KQK18616
BdCO2	BRADI_3g56260v3	PNT69480
BdCO4	BRADI_5g14600v3	PNT61381
BdCO5	BRADI_3g48447v3	KQK00284
BdCO6	BRADI_1g31280v3	KQK16890
BdCO7	BRADI_3g05800v3	KQJ93625
BdCO8	BRADI_3g19010v3	KQJ95789
BdCO10	BRADI_1g11310v3	KQK13611
BdCO11	BRADI_3g57000v3	KQK01604
BdCO12	BRADI_1g43990v3	KQK18673
BdCO13	BRADI_1g43220v3	KQK18548
BdCO14	BRADI_3g56490v3	KQK01529
BdCO15	BRADI_3g41500v3	KQJ99163
BdCO16	BRADI_1g62420v3	KQK21685
BdCO18	BRADI_1g18407v3	KQK14753
BdCO19	BRADI_1g52360v3	KQK20085
BdCMF1	BRADI_2g54260v3	KQK10466
BdCMF3	BRADI_3g03770v3	KQJ93306
BdCMF4	BRADI_1g75760v3	PNT78238
BdCMF5	BRADI_2g22800v3	KQK05831
BdCMF6	BRADI_2g14220v3	KQK04553
BdCMF7	BRADI_1g34060v3	KQK17373
BdCMF9	BRADI_3g13960v3	KQJ94903
BdCMF10	BRADI_3g28290v3	PNT67506
BdCMF13	BRADI_4g45330v3	KQJ92702
BdCMF14	BRADI_4g45327v3	PNT65637
BdCMF15	BRADI_3g10010v3	KQJ94343
BdTOC1	BRADI_3g48880v3	KQK00364
BdPRR37	BRADI_1g16490v3	PNT74526
BdPRR59	BRADI_4g24967v3	KQJ89340
BdPRR73	BRADI_1g65910v3	KQK22220
BdPRR95	BRADI_4g36077v3	KQJ91172
BdZIM1	BRADI_1g33980v3	KQK17366
BdZIM2	BRADI_1g09550v3	KQK13347
BdZIM3.1	BRADI_3g03800v3	KQJ93312
BdZIM3.2	BRADI_3g03810v3	KQJ93313
BdZIM4	BRADI_1g12330v3	KQK13765
BdZIM5	BRADI_4g15720v3	KQJ88128
Arabidopsis
Name	Gene_ID	Protein_ID	Alter_Name
AtCO	AT5G15840	AT5G15840.1	AtBBX1
AtCOL1	AT5G15850	AT5G15850.1	AtBBX2
AtCOL2	AT3G02380	AT3G02380.1	AtBBX3
AtCOL3	AT2G24790	AT2G24790.1	AtBBX4
AtCOL4	AT5G24930	AT5G24930.1	AtBBX5
AtCOL5	AT5G57660	AT5G57660.1	AtBBX6
AtCOL6	AT1G68520	AT1G68520.1	AtBBX14
AtCOL7	AT1G73870	AT1G73870.1	AtBBX16
AtCOL8	AT1G49130	AT1G49130.2	AtBBX17
AtCOL9	AT3G07650	AT3G07650.4	AtBBX7
AtCOL10	AT5G48250	AT5G48250.1	AtBBX8
AtCOL11	AT4G15250	AT4G15250.1	AtBBX9
AtCOL12	AT3G21880	AT3G21880.1	AtBBX10
AtCOL13	AT2G47890	AT2G47890.1	AtBBX11
AtCOL14	AT2G33500	AT2G33500.1	AtBBX12
AtCOL15	AT1G28050	AT1G28050.1	AtBBX13
AtCOL16	AT1G25440	AT1G25440.1	AtBBX15
AtCMF1	AT1G04500	AT1G04500.4
AtCMF2	AT1G05290	AT1G05290.1
AtCMF3	AT1G07050	AT1G07050.1
AtCMF4	AT1G63820	AT1G63820.1
AtCMF5	AT2G32310	AT2G32310.1
AtCMF6	AT2G33350	AT2G33350.2
AtCMF7	AT2G46670	AT2G46670.1
AtCMF8	AT3G12890	AT3G12890.1	AtASML2
AtCMF9	AT4G25990	AT4G25990.1
AtCMF10	AT4G27900	AT4G27900.1
AtCMF11	AT5G14370	AT5G14370.1
AtCMF12	AT5G41380	AT5G41380.1
AtCMF13	AT5G53420	AT5G53420.1
AtCMF14	AT5G57180	AT5G57180.2
AtCMF15	AT5G59990	AT5G59990.1
AtTOC1	AT5G61380	AT5G61380.1	AtPRR1
AtPRR3	AT5G60100	AT5G60100.1
AtPRR5	AT5G24470	AT5G24470.1
AtPRR7	AT5G02810	AT5G02810.1
AtPRR9	AT2G46790	AT2G46790.1
AtZIM	AT4G24470	AT4G24470.1
AtZML1	AT3G21175	AT3G21175.1
AtZML2	AT1G51600	AT1G51600.2
