# Supplementary material for: Genome-wide Identification and Analysis of CCT&nbsp;Genes in Wheat (Triticum Aestivum L.)
Source: Research Square preprint supplement (doi:10.21203/rs.3.rs-104841/v1), 2020-11-13
Supplement: Supplementary file 2 [file 624ee89c26bc864c6ec93278.xlsx]

## Sheet: Sheet2
Up_regulated genes
stage	v1_vs_v0	v2_vs_v0	v3_vs_v0	v4_vs_v0	v5_vs_v0	v6_vs_v0	pv1_vs_v0		Gene_cluster	SUM_Difference_Expressed_Stages
Gene_list	TaCMF10-A	TaCMF10-D	TaCMF10-D	TaCMF10-A	TaCMF10-A	TaCMF10-A	TaCMF10-D		TaCMF6	31
	TaCMF10-D	TaCMF11-A	TaCMF11-A	TaCMF10-D	TaCMF10-D	TaCMF10-D	TaCMF11-A		TaCMF11	20
	TaCMF11-A	TaCMF11-B	TaCMF11-B	TaCMF11-A	TaCMF11-A	TaCMF11-A	TaCMF11-B		TaCO18	20
	TaCMF11-B	TaCMF11-D	TaCMF11-D	TaCMF11-B	TaCMF11-B	TaCMF11-D	TaCMF11-D		TaPRR95	18
	TaCMF11-D	TaCMF4-B	TaCMF4-B	TaCMF11-D	TaCMF11-D	TaCMF13-A	TaCMF4-B		TaCO16	17
	TaCMF4-B	TaCMF6-A	TaCMF6-A	TaCMF6-A	TaCMF3-B	TaCMF3-B	TaCMF6-A		TaCO6	12
	TaCMF6-A	TaCMF6-B	TaCMF6-A2	TaCMF6-B	TaCMF3-D	TaCMF4-B	TaCMF6-A2		TaPRR73	12
	TaCMF6-B	TaCMF6-D	TaCMF6-B	TaCMF6-D	TaCMF4-B	TaCMF6-A	TaCMF6-B		TaCMF10	11
	TaCMF6-D	TaCMF7-A	TaCMF6-D	TaCMF7-A	TaCMF6-A	TaCMF6-A2	TaCMF6-B3		TaCMF7	8
	TaCMF9-A	TaCO16-A	TaCMF6-D3	TaCMF7-B	TaCMF6-A2	TaCMF6-B	TaCMF6-D		TaCMF9	8
	TaCMF9-B	TaCO16-B	TaCMF7-A	TaCMF8-A2	TaCMF6-B	TaCMF6-D	TaCMF6-D3		TaCMF4	6
	TaCO16-A	TaCO16-D	TaCMF8-A2	TaCO16-A	TaCMF6-B2	TaCMF9-A	TaCMF7-A		TaPPD1	5
	TaCO16-B	TaCO18-A	TaCMF9-A	TaCO16-B	TaCMF6-B3	TaCMF9-B	TaCMF7-B		TaCO4	4
	TaCO18-A	TaCO18-B	TaCMF9-B	TaCO16-D	TaCMF6-D	TaCO11-D	TaCMF9-A		TaPRR59	4
	TaCO18-B	TaCO18-D	TaCO16-A	TaCO18-A	TaCMF6-D3	TaCO12-D	TaCO16-A		TaCMF3	3
	TaCO3-A	TaCO6-A	TaCO16-B	TaCO18-B	TaCMF7-A	TaCO13-A	TaCO16-B		TaCMF8	3
	TaCO4-A	TaPPD1-A	TaCO16-D	TaCO18-D	TaCMF7-B	TaCO14-B	TaCO16-D		TaCO14	2
	TaCO4-D	TaPRR59-A	TaCO18-A	TaCO6-A	TaCMF8-A2	TaCO14-D	TaCO18-A		TaCO3	2
	TaCO5-D	TaPRR73-B	TaCO18-B	TaCO6-B	TaCMF9-A	TaCO18-A	TaCO18-B		TaCO5	2
	TaCO6-A	TaPRR73-D	TaCO18-D	TaCO6-D	TaCO16-A	TaCO18-B	TaCO18-D		TaCO8	2
	TaPRR73-B	TaPRR95-A	TaCO3-A	TaPPD1-A	TaCO16-B	TaCO18-D	TaCO6-A		TaCMF13	1
	TaPRR73-D	TaPRR95-B	TaCO4-A	TaPRR59-A	TaCO16-D	TaCO2-A	TaCO6-D		TaCO11	1
	TaPRR95-A	TaPRR95-D	TaCO4-D	TaPRR73-B	TaCO18-A	TaCO8-B	TaPPD1-A		TaCO12	1
	TaPRR95-B		TaCO5-D	TaPRR73-D	TaCO18-B	TaPPD1-U	TaPRR59-A		TaCO13	1
	TaPRR95-D		TaCO6-A	TaPRR95-A	TaCO18-D		TaPRR73-B		TaCO2	1
			TaCO6-B	TaPRR95-B	TaCO6-A		TaPRR73-D
			TaCO6-D	TaPRR95-D	TaCO6-D		TaPRR95-A
			TaPRR73-B		TaCO8-B		TaPRR95-B
			TaPRR73-D		TaPPD1-A		TaPRR95-D
			TaPRR95-A		TaPRR59-A
			TaPRR95-B		TaPRR73-B
			TaPRR95-D		TaPRR73-D
					TaPRR95-A
					TaPRR95-B
					TaPRR95-D
Down_regulated genes
stage	v1_vs_v0	v2_vs_v0	v3_vs_v0	v4_vs_v0	v5_vs_v0	v6_vs_v0	pv1_vs_v0		Gene_cluster	SUM_Difference_Expressed_Stages
Gene_list	TaCMF13-B	TaCMF10-A	TaCMF13-B	TaCMF13-B	TaCMF13-B	TaCMF13-B	TaCMF10-A		TaCO1	18
	TaCMF4-D	TaCMF13-B	TaCMF13-D	TaCMF13-D	TaCMF4-D	TaCMF4-D	TaCMF13-A		TaCO15	14
	TaCMF8-A	TaCMF13-D	TaCMF4-D	TaCMF1-A	TaCMF5-B	TaCMF5-B	TaCMF13-B		TaCMF13	11
	TaCMF8-B	TaCMF1-A	TaCMF5-B	TaCMF4-D	TaCMF5-D	TaCMF5-D	TaCMF4-A		TaCMF5	11
	TaCO14-A	TaCMF4-D	TaCO14-A	TaCMF5-B	TaCMF8-D	TaCMF6-B3	TaCMF4-D		TaCMF8	9
	TaCO15-A	TaCMF5-B	TaCO15-D	TaCMF5-D	TaCO15-A	TaCMF8-A	TaCMF5-B		TaCMF4	8
	TaCO15-D	TaCMF5-D	TaCO1-A	TaCMF8-A	TaCO15-B	TaCO19-B	TaCMF5-D		TaCO2	8
	TaCO1-A	TaCMF8-A	TaCO1-B	TaCMF8-D	TaCO15-D	TaCO7-B	TaCMF8-A		TaCO7	8
	TaCO1-B	TaCO14-A	TaCO1-D	TaCO14-A	TaCO1-A		TaCMF8-D		TaPPD1	6
	TaCO1-D	TaCO15-A	TaCO2-B	TaCO15-A	TaCO1-B		TaCO12-B		TaCO14	5
	TaCO2-D	TaCO15-D	TaCO2-D	TaCO15-B	TaCO1-D		TaCO14-A		TaCMF10	2
	TaCO7-B	TaCO1-A	TaCO7-A	TaCO15-D	TaCO2-A		TaCO15-A		TaCMF1	2
	TaPPD1-D	TaCO1-B	TaPPD1-D	TaCO1-A	TaCO2-D		TaCO15-B		TaCO5	2
		TaCO1-D		TaCO1-B	TaCO7-B		TaCO15-D		TaCMF6	1
		TaCO2-D		TaCO1-D	TaPPD1-D		TaCO1-A		TaCO12	1
		TaCO7-B		TaCO5-B			TaCO1-B		TaCO19	1
		TaPPD1-D		TaCO7-B			TaCO1-D
				TaPPD1-D			TaCO2-B
							TaCO2-D
							TaCO5-A
							TaCO7-B
							TaCO7-D
							TaPPD1-D
